# Supplementary material
Source: PubMed Central journal article supplement (PMC2879780)
Supplement: pp.110.154369_1.pdf [file pp.110.154369_1.pdf]

# Supplemental Figure 1

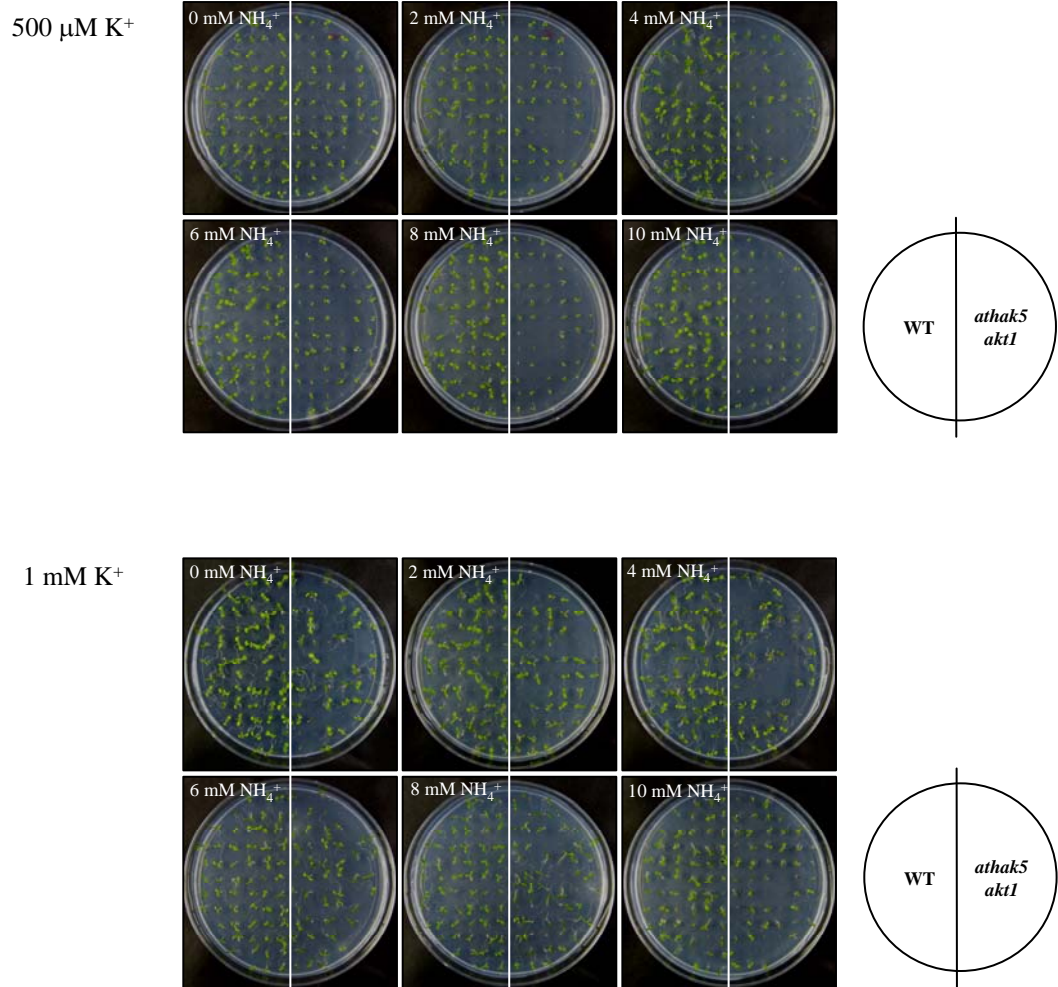

Supplemental Figure 1. Effect of  $\text{NH}_4^+$  on seedling establishment of *athak5 akt1* double mutant. Seeds of wild-type and *athak5 akt1* double mutant were plated on media containing different concentrations of  $\text{K}^+$  and  $\text{NH}_4^+$ . The photographs were taken at 7 days after sowing.

## Supplemental Figure 2

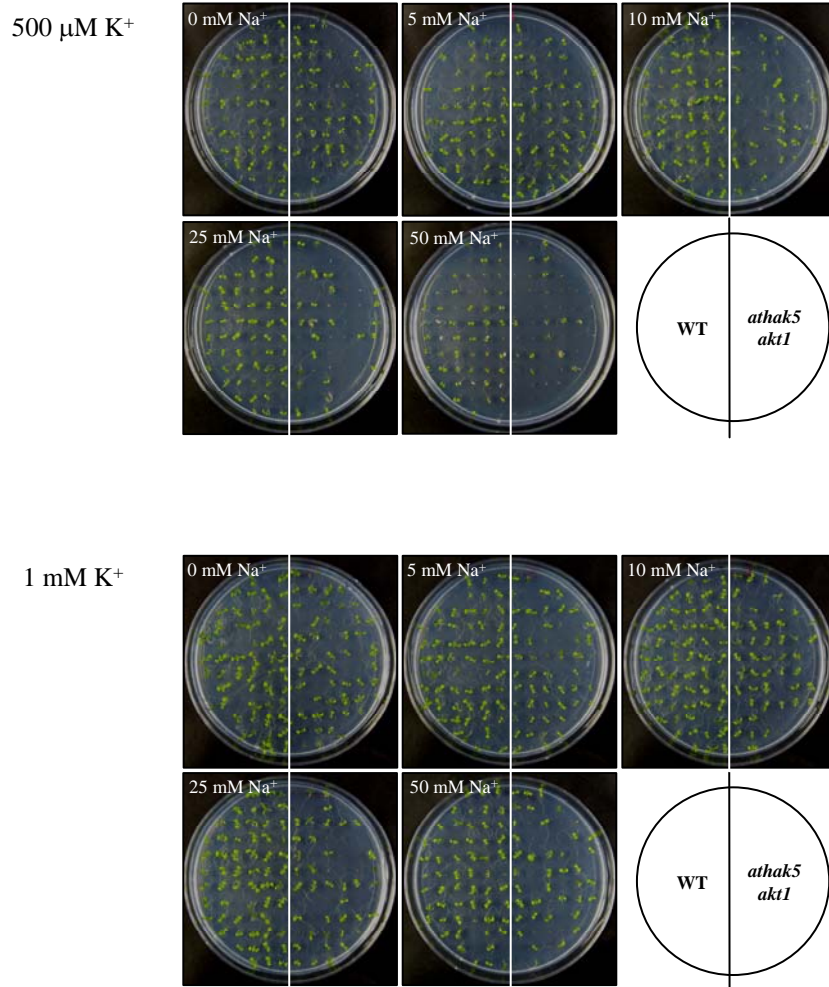

Supplemental Figure 2. Effect of  $\text{Na}^+$  on seedling establishment of *athak5 akt1* double mutant. Seeds of wild-type and *athak5 akt1* double mutant were plated on media containing different concentrations of  $\text{K}^+$  and  $\text{Na}^+$ . The photographs were taken at 7 days after sowing.

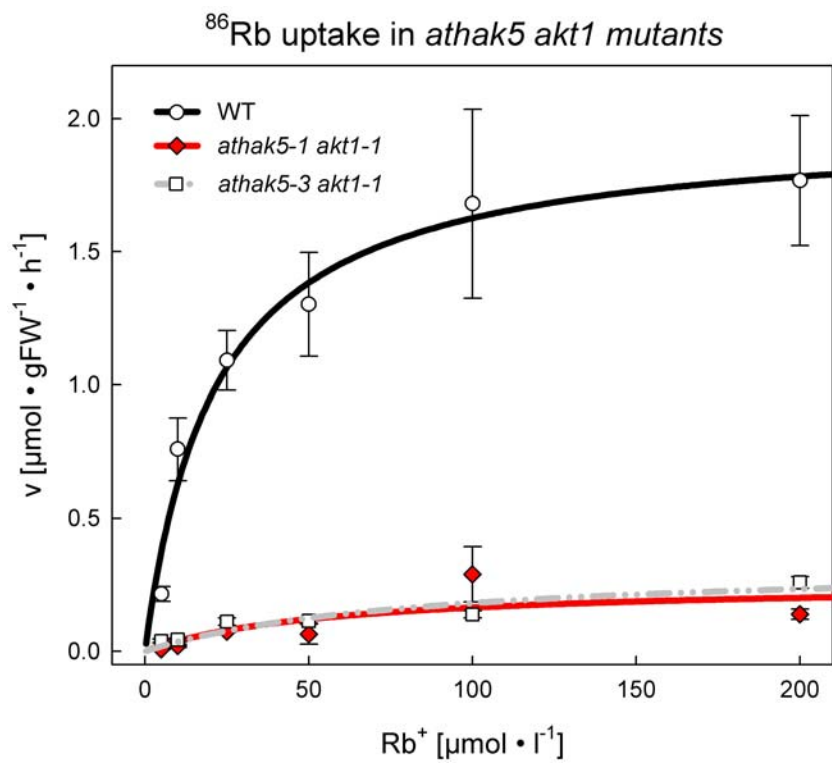

Supplemental Figure 3. <sup>86</sup>Rb uptake in *athak5-1 akt1-1* mutants (red line and diamonds).

Wild-type and *athak5-3 akt1-1* data are included for comparison and correspond to data presented in Figure 8.
